# Supplementary material for: The extended renin-angiotensin system: a promising target for traumatic brain injury therapeutics
Source: PubMed Central journal article supplement — Neural Regen Res. 2019 Dec 10;15(6):1025–6. doi: 10.4103/1673-5374.270304 (PMC7034274; doi:10.4103/1673-5374.270304), 2019-12-10
Supplement: NRR-15-1025_Suppl2.pdf [file NRR-15-1025_Suppl2.pdf]

## OPEN PEER REVIEW REPORT 2

**Name of journal:** Neural Regeneration Research

**Manuscript NO:** NRR-D-19-00514

**Title:** The Extended Renin-Angiotensin System – A Promising Target For Traumatic Brain Injury Therapeutics

**Reviewer's Name:** Melanie G. Urbanek

**Reviewer's country:** United States

**Date sent for review:** 2019-09-02

### COMMENTS TO AUTHORS

The author presents newer ideas for treatment of traumatic brain injury (TBI). Following TBI, within the renin-angiotensin system there is activation of angiotensin II type I receptor. Sequela result in pathological processes within the central nervous system. The author presents studies which work as Angiotensin II receptor blockers. Bioactive peptides of the extended Renin-Angiotensin system and several medications are described as used in pre-clinical studies or as proposed for future studies. A summary diagram/figure demonstrating the major points would help clarity.
